# Supplementary material for: Genetic Association of Curative and Adverse Reactions to Tyrosine Kinase Inhibitors in Chinese advanced Non-Small Cell Lung Cancer patients
Source: PubMed Central journal article supplement (PMC4796893; doi:10.1038/srep23368), 2016-03-18
Supplement: srep23368-s1.pdf [file srep23368-s1.pdf]

# Genetic Association of Curative and Adverse Reactions to Tyrosine Kinase Inhibitors in Chinese advanced Non-Small Cell Lung Cancer patients

Yunfeng Ruan, Jie Jiang, Liang Guo, Yan Li, Hailiang Huang, Lu Shen, Mengqi Luan, Mo Li, Huihui Du, Cheng Ma, Lin He, Xiaoqing Zhang, Shengying Qin

Supplementary file: The SNP sites analyzed in association study and multivariant interaction analysis

| Chromosome | Position  | Gene    | rs number   |
|------------|-----------|---------|-------------|
| 1          | 40754405  | miRNA   | rs112439044 |
| 2          | 233760498 | UGT1A1  | rs4148323   |
| 4          | 88131171  | ABCG2   | rs2231142   |
| 4          | 88139962  | ABCG2   | rs2231137   |
| 5          | 55170716  | miRNA   | rs10061133  |
| 7          | 55147325  | EGFR    | rs730437    |
| 7          | 55162412  | EGFR    | rs2293347   |
| 7          | 55206391  | EGFR    | rs884225    |
| 7          | 87509329  | ABCB1   | rs1045642   |
| 7          | 87527735  | ABCB1   | rs7787082   |
| 7          | 87535670  | ABCB1   | rs10248420  |
| 7          | 87550285  | ABCB1   | rs1128503   |
| 7          | 87600877  | ABCB1   | rs3213619   |
| 7          | 99648291  | CYP3A5  | rs15524     |
| 7          | 99672916  | CYP3A5  | rs776746    |
| 7          | 99756491  | CYP3A4  | rs12333983  |
| 7          | 99763247  | CYP3A4  | rs4646440   |
| 7          | 99763843  | CYP3A4  | rs2242480   |
| 7          | 99764003  | CYP3A4  | rs28371759  |
| 7          | 100093806 | miRNA   | rs72631824  |
| 7          | 116681748 | CMET    | rs38845     |
| 10         | 94762804  | CYP2C19 | rs17885098  |
| 10         | 94780653  | CYP2C19 | rs4986893   |
| 10         | 94781999  | CYP2C19 | rs72558186  |
| 10         | 94937495  | CYP2C9  | rs4918758   |

|    |           |        |             |
|----|-----------|--------|-------------|
| 10 | 94937702  | CYP2C9 | rs9332098   |
| 10 | 94981296  | CYP2C9 | rs1057910   |
| 12 | 6964138   | miRNA  | rs111718468 |
| 14 | 101041390 | miRNA  | rs12894467  |
| 14 | 104772855 | AKT1   | rs2494732   |
| 14 | 104773557 | AKT1   | rs1130233   |
| 14 | 104803442 | AKT1   | rs3803300   |
| 15 | 74719300  | CYP1A1 | rs4646903   |
| 15 | 74720644  | CYP1A1 | rs1048943   |
| 15 | 74746626  | CYP1A2 | rs2069521   |
| 15 | 74746892  | CYP1A2 | rs2069522   |
| 15 | 74749576  | CYP1A2 | rs762551    |
| 15 | 74750940  | CYP1A2 | rs4646425   |
| 15 | 74751897  | CYP1A2 | rs2472304   |
| 19 | 13836478  | miRNA  | rs895819    |
